# Supplementary material
Source: publisher site journal article supplement (http://e-cmh.org/upload/media/cmh-2023-0485-Supplementary-file.pdf)
Supplement: Supplementary file 1 [file cmh-2023-0485-Supplementary-file.pdf]

## SEARCH STRATEGY

### PUBMED

1. ("nonalcoholic fatty liver" [tw] OR "non-alcoholic fatty liver" [tw] OR ("non-alcoholic" [ti] AND fatty [ti]) OR "non-alcoholic fatty liver disease" [mesh] OR (nonalcoholic [ti] AND fatty [ti]) OR ((non-alcoholic [ti] OR nonalcoholic [ti]) AND "fatty liver" [mesh]) OR "nonalcoholic steatohepatitis" [tw] OR NAFLD [tw])
2. (prevalence\* [tw] OR incidence [tw] OR epidemiol\* [tw] OR seroprevalen\* [tw] OR "prevalence" [mesh] OR "incidence" [mesh] OR "epidemiology" [mesh] OR "epidemiology" [sh])
3. ("randomized controlled trial" [pt] OR "controlled clinical trial" [pt] OR randomized [ti] OR "clinical trials as topic"[mesh] OR "clinical trial" [pt] NOT trial\* [ti])
4. ("animals" [mesh] NOT "humans" [mesh])
5. 1 AND 2 NOT 3 NOT 5

### EMBASE

('nonalcoholic fatty liver':ti,ab,kw OR 'non-alcoholic fatty liver':ti,ab,kw OR ('non-alcoholic':ti AND fatty:ti) OR 'nonalcoholic fatty liver'/exp OR 'nonalcoholic fatty liver' OR (nonalcoholic:ti AND fatty:ti) OR 'nonalcoholic steatohepatitis':ti,ab,kw OR nafld:ti,ab,kw) AND ('prevalence'/exp OR 'prevalence':ti,ab,kw OR 'incidence'/exp OR 'incidence':ti,ab,kw OR 'epidemiology'/de OR 'epidemiol\*':ti,kw OR prevalen\*:ti,kw OR incidence:ti,ab,kw OR seroprevalen\*:ti,ab,kw) NOT ('randomized controlled trial'/exp OR 'randomized controlled trial' OR 'controlled clinical trial'/exp OR 'controlled clinical trial' OR 'randomized':ti OR trial\*:ti) AND [humans]/lim

### COCHRANE LIBRARY DATASE

("nonalcoholic fatty liver" OR "non-alcoholic fatty liver" OR "nonalcoholic steatohepatitis" OR NAFLD) AND (prevalen\* OR incidence OR epidemiol\* OR seroprevalen\*)
